# Supplementary material
Source: MDPI journal article supplement (https://www.mdpi.com/2075-4701/10/7/958)

# Application Note

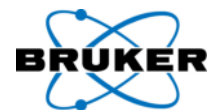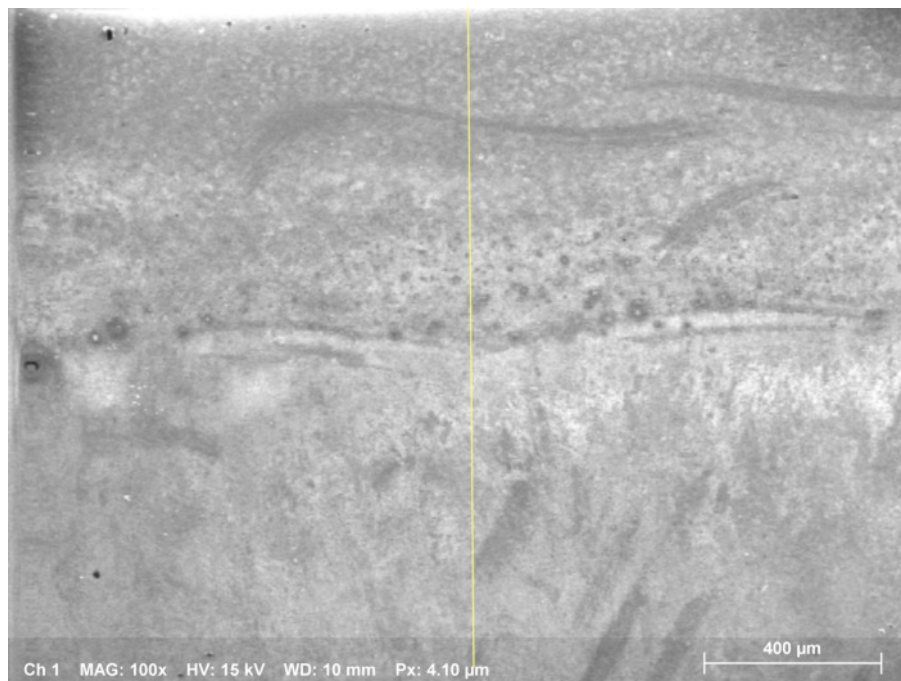

| Name     | Date     | Time        | HV [kV]  | Mag  | WD [mm] |
|----------|----------|-------------|----------|------|---------|
| Test 176 | 3/8/2019 | 12:25:45 PM | 15.0 keV | 100x | 10.0 mm |

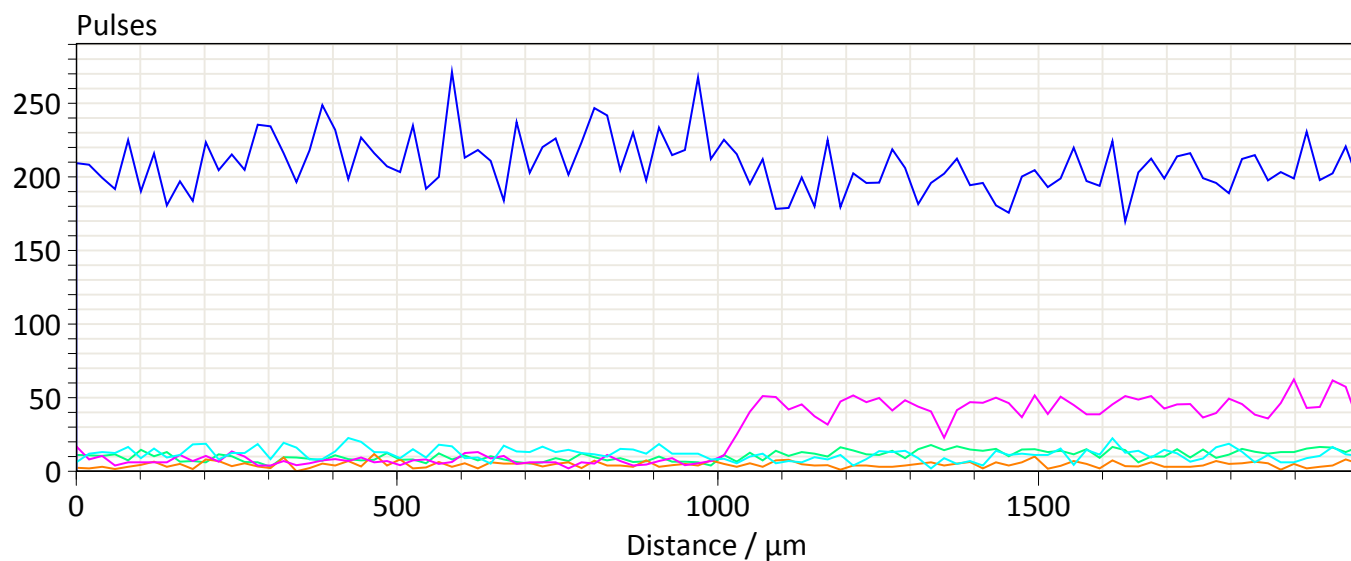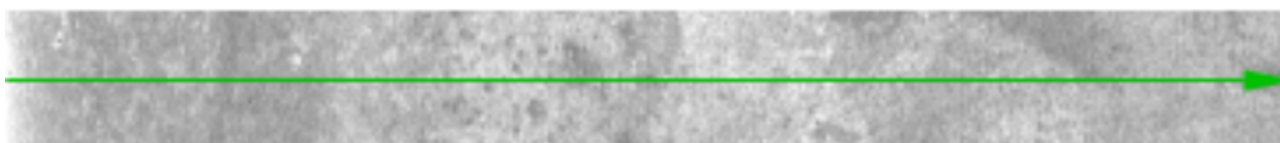

| Name | Date     | Time        | Points | Length [mm]          |
|------|----------|-------------|--------|----------------------|
| Test | 3/8/2019 | 12:27:38 PM | 100    | 1998.9 $\mu\text{m}$ |

# Application Note

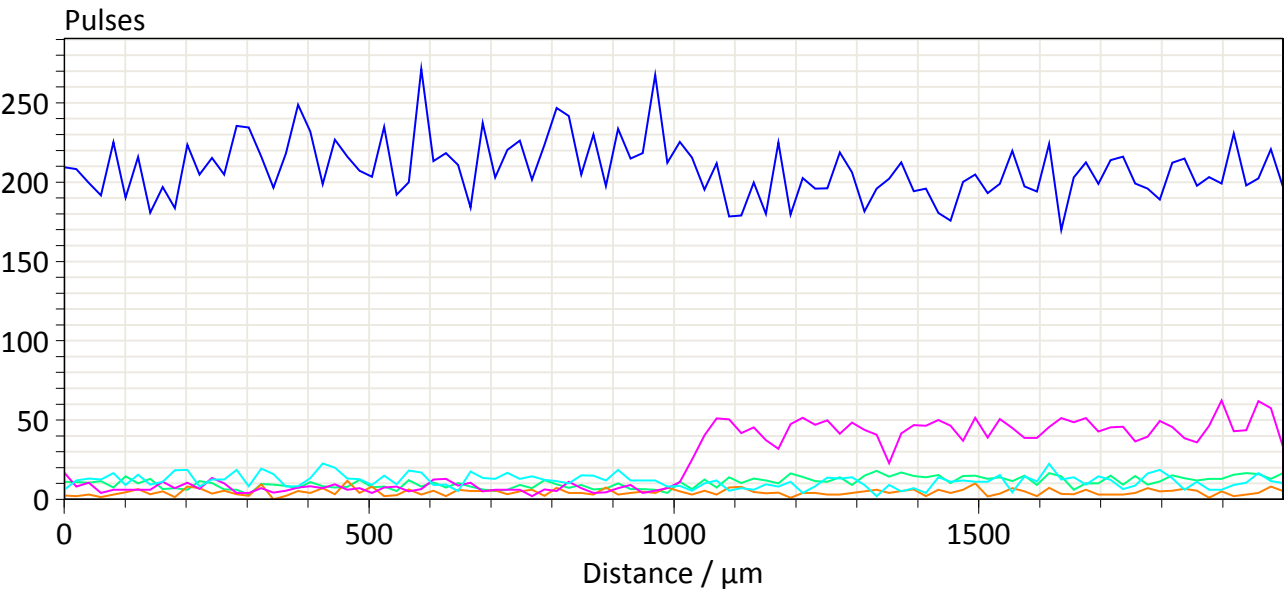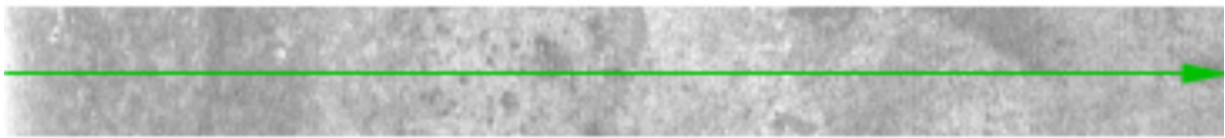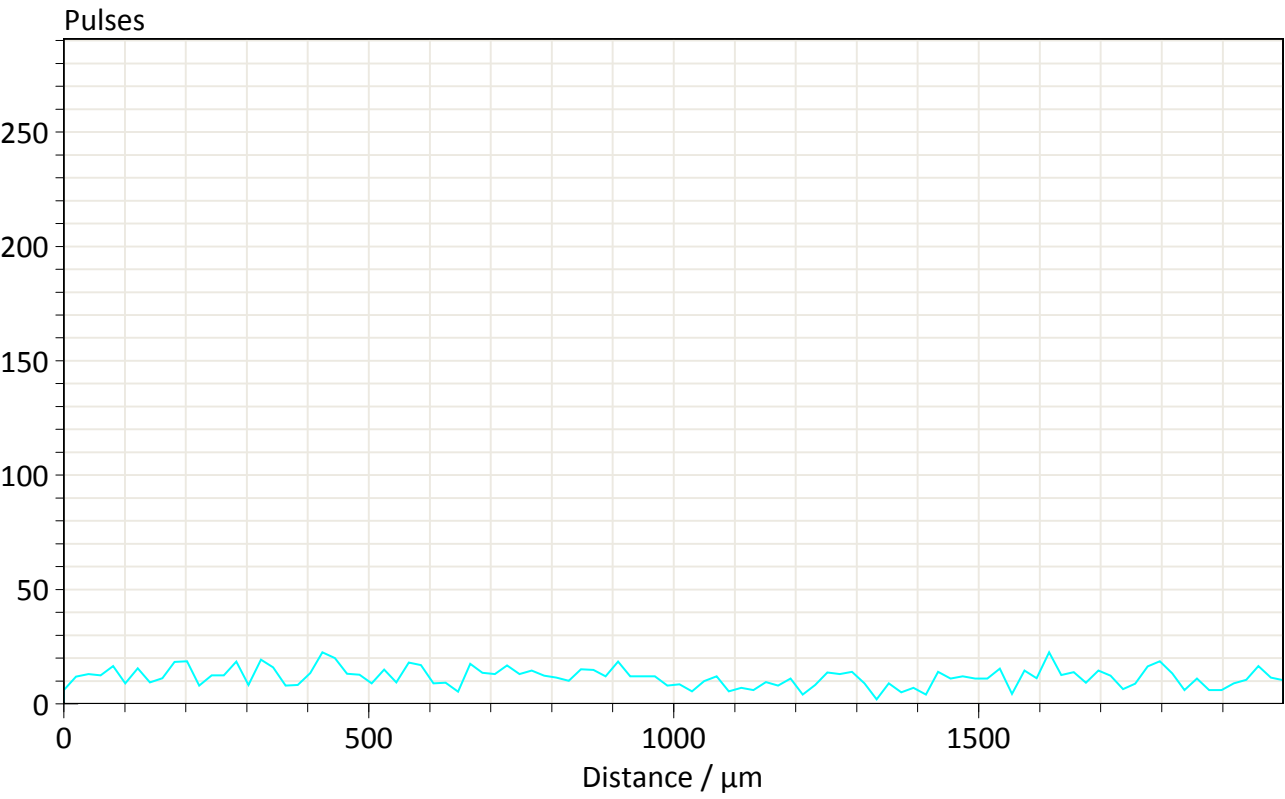

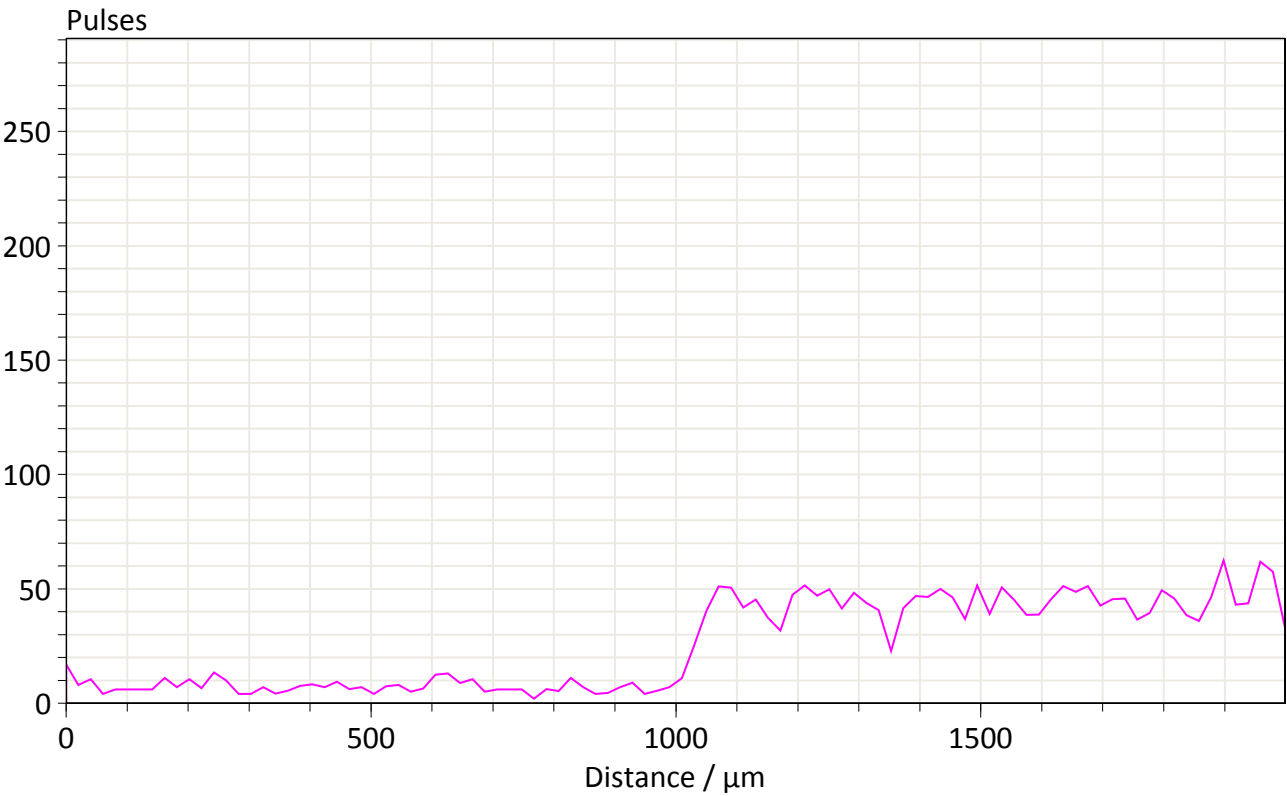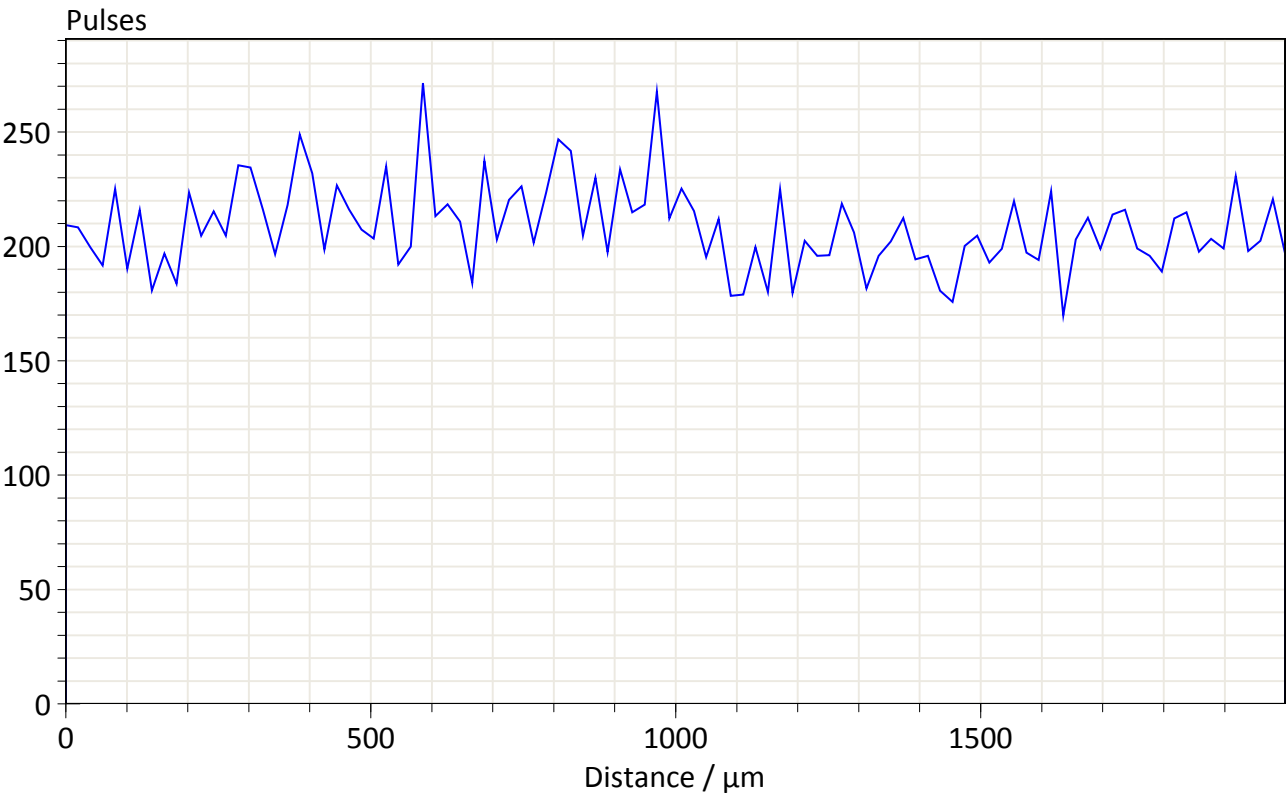

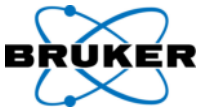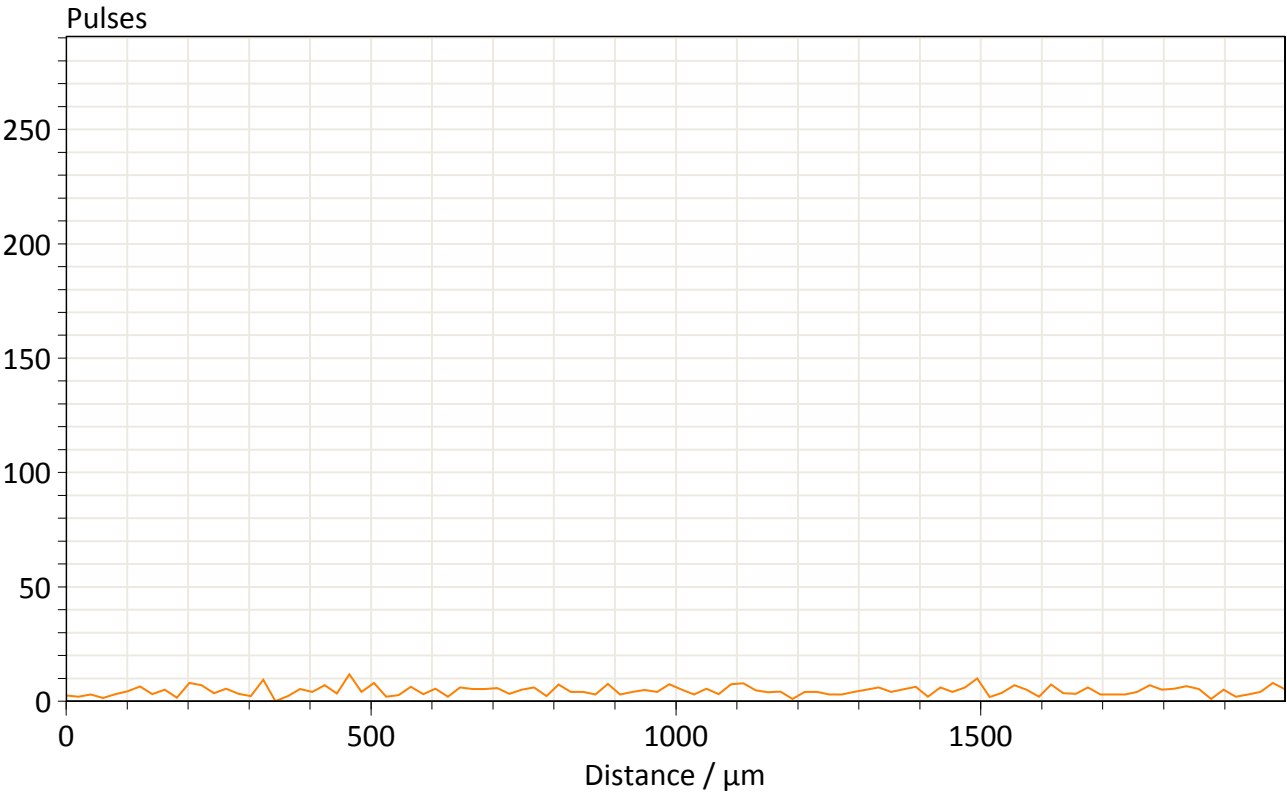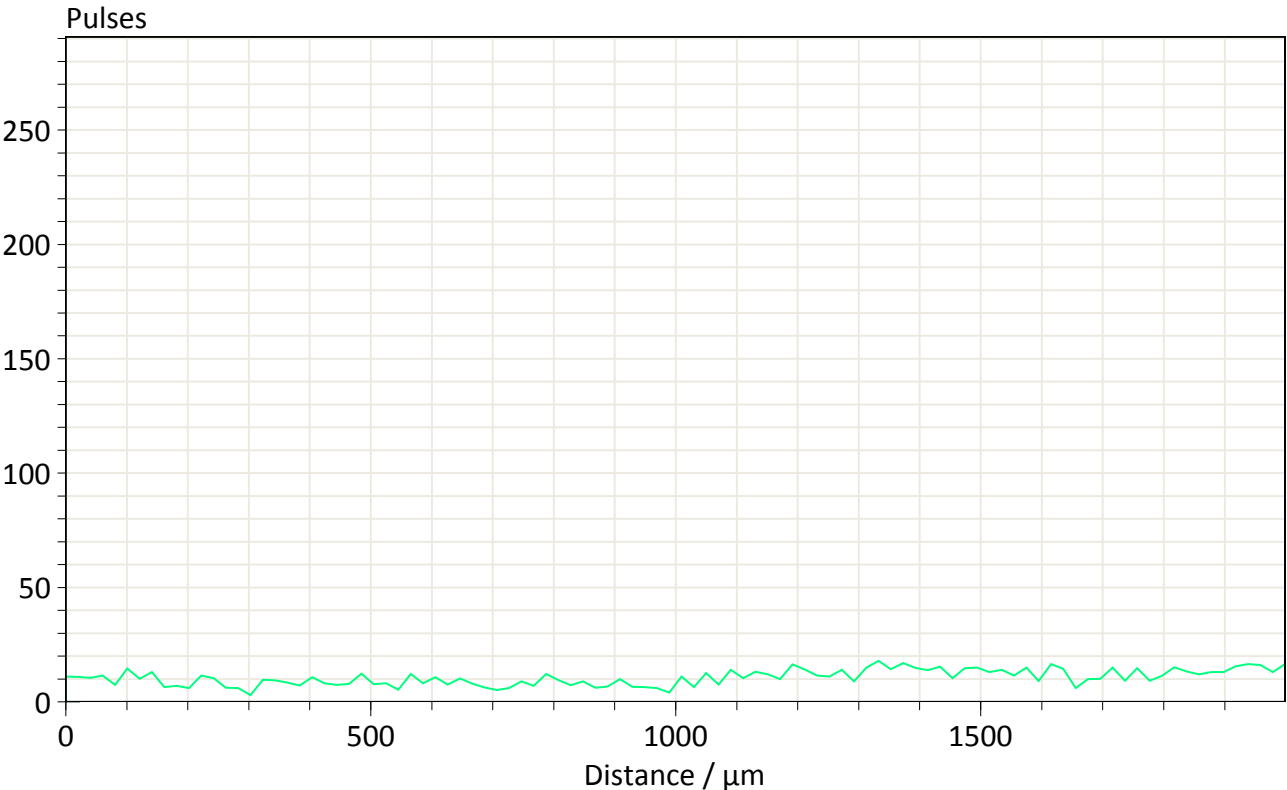

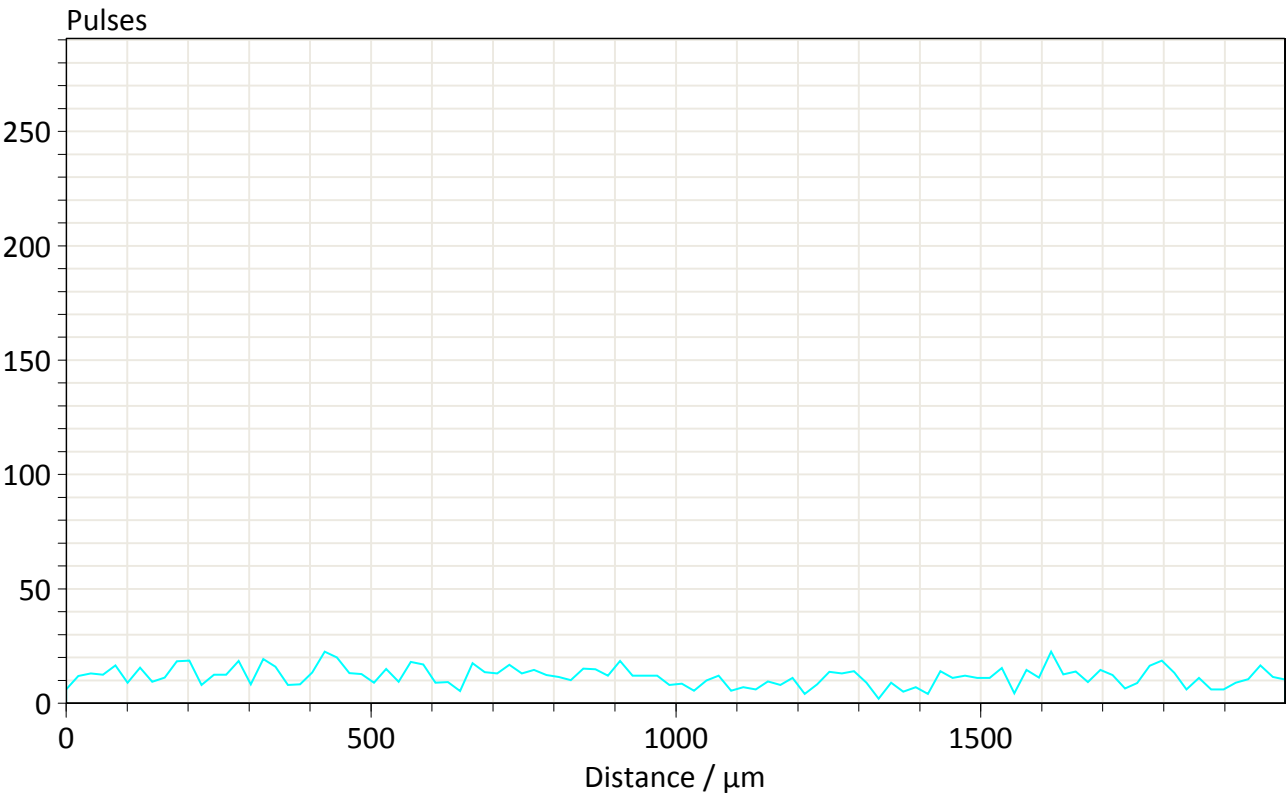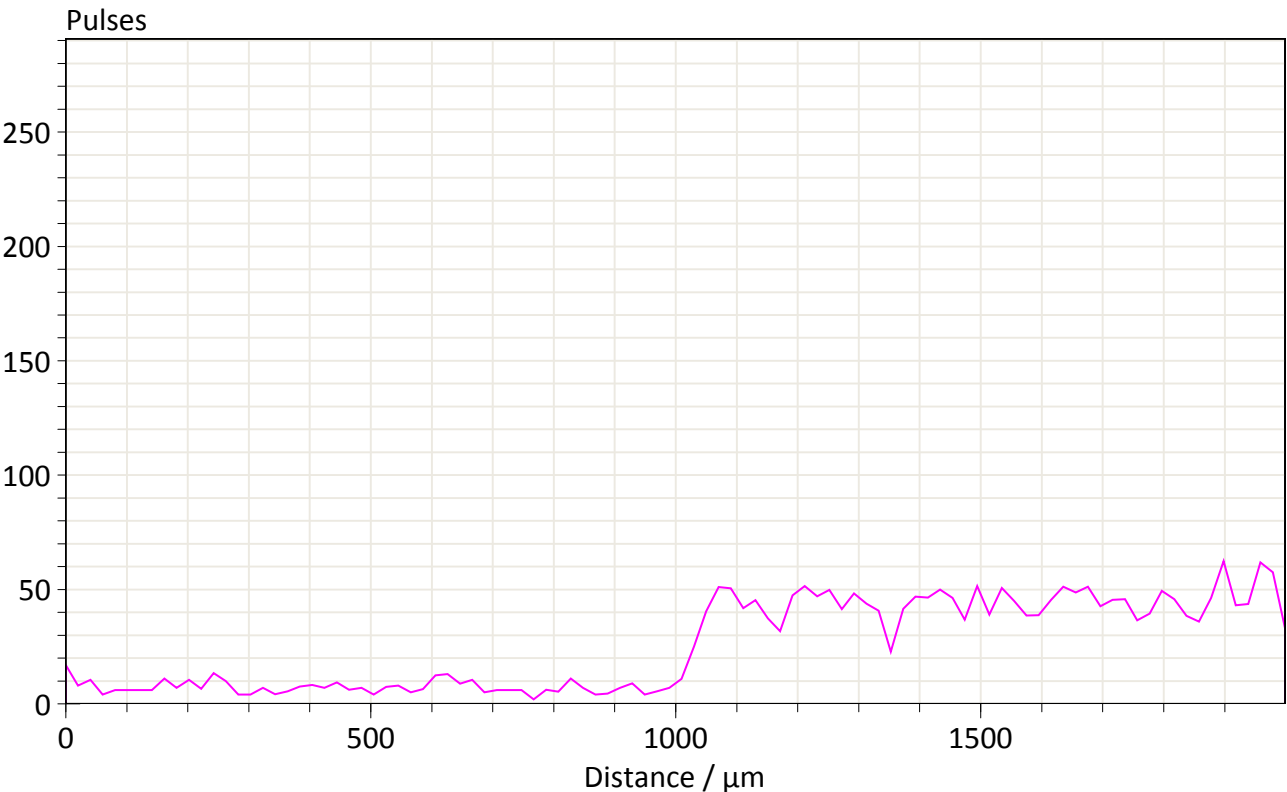

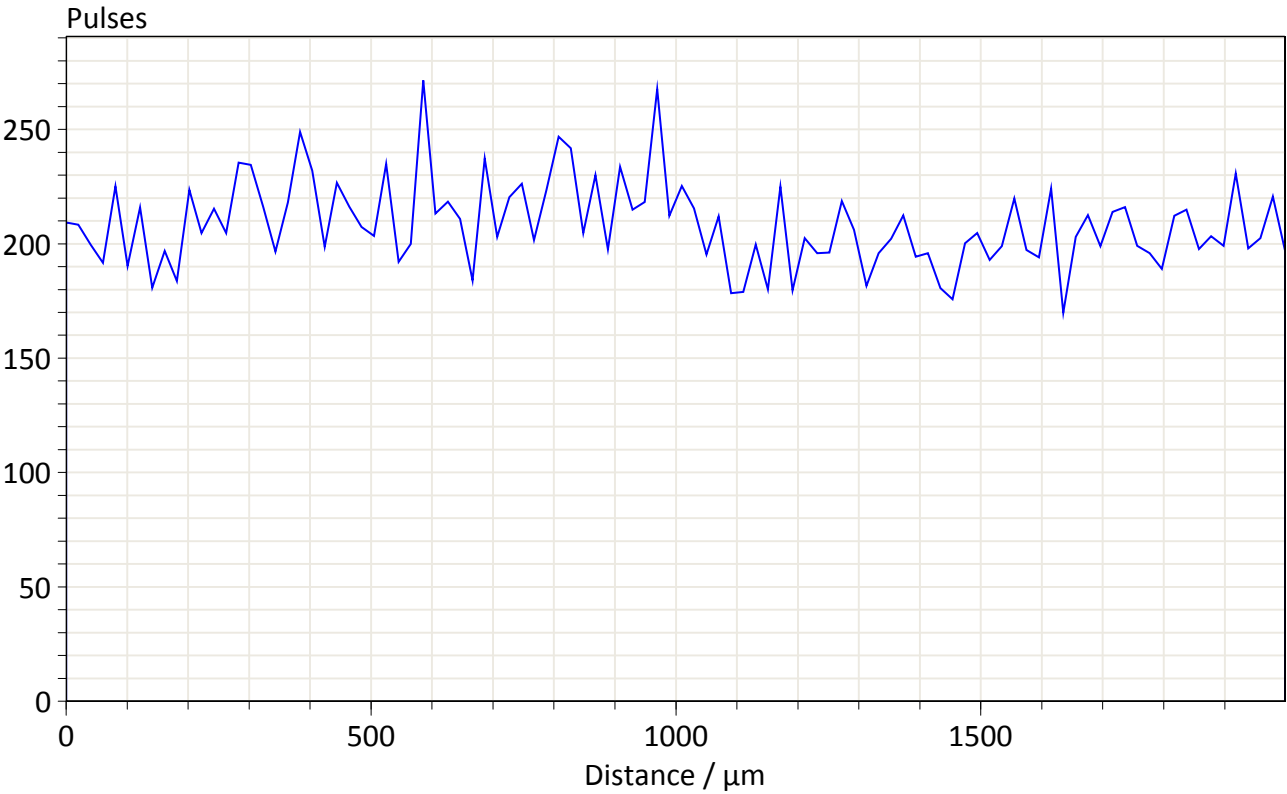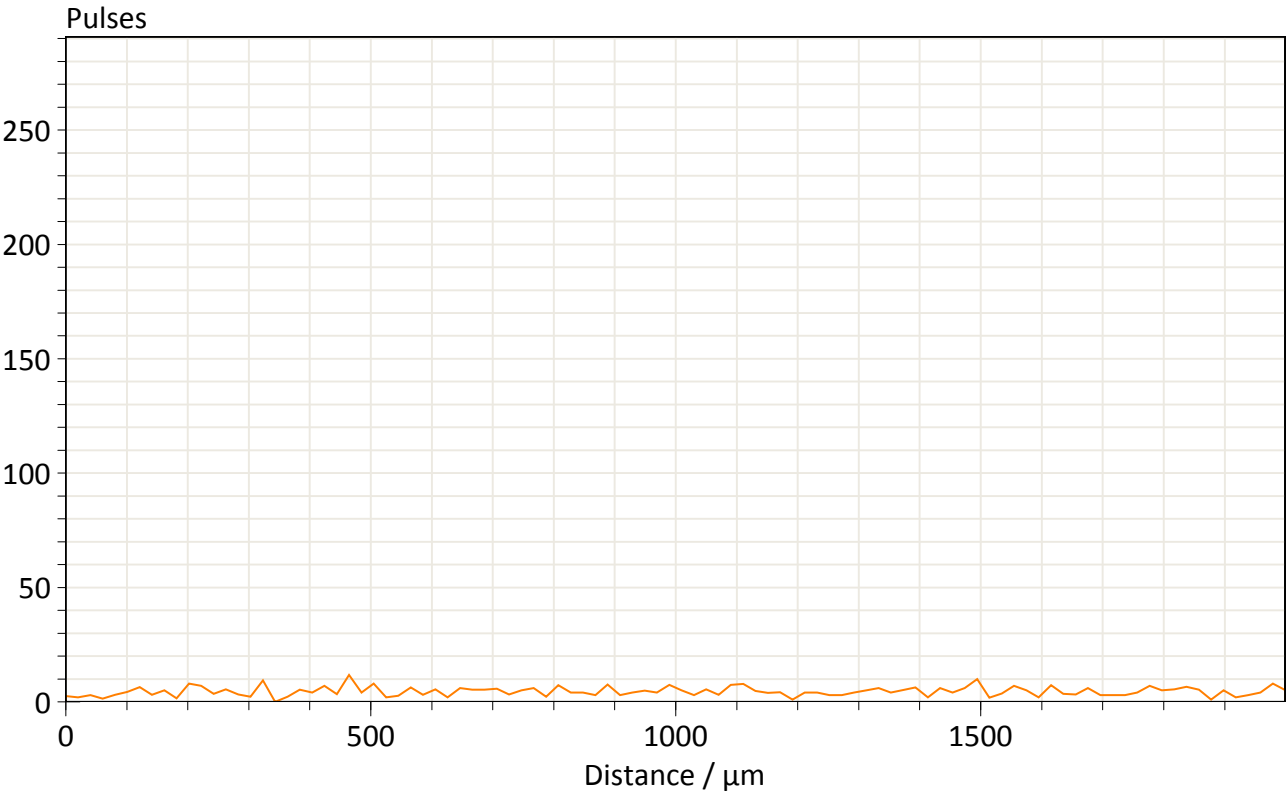

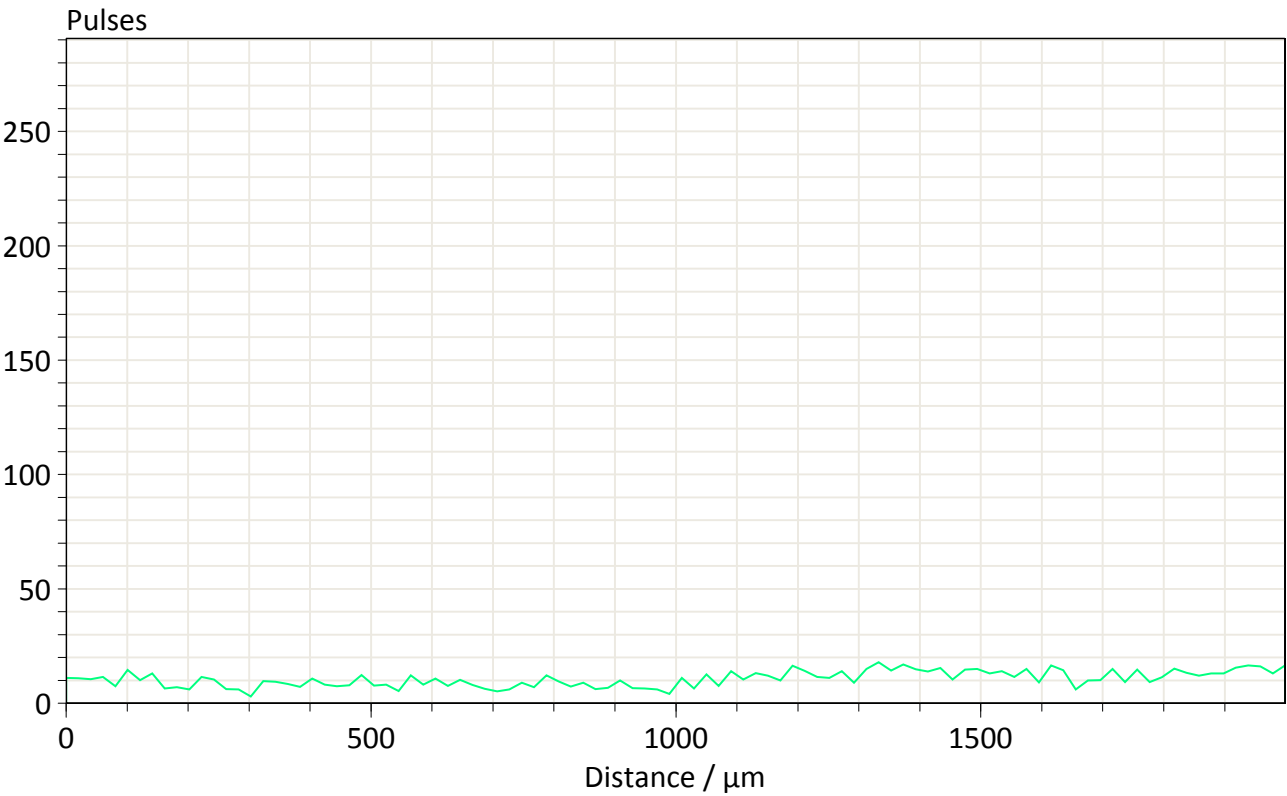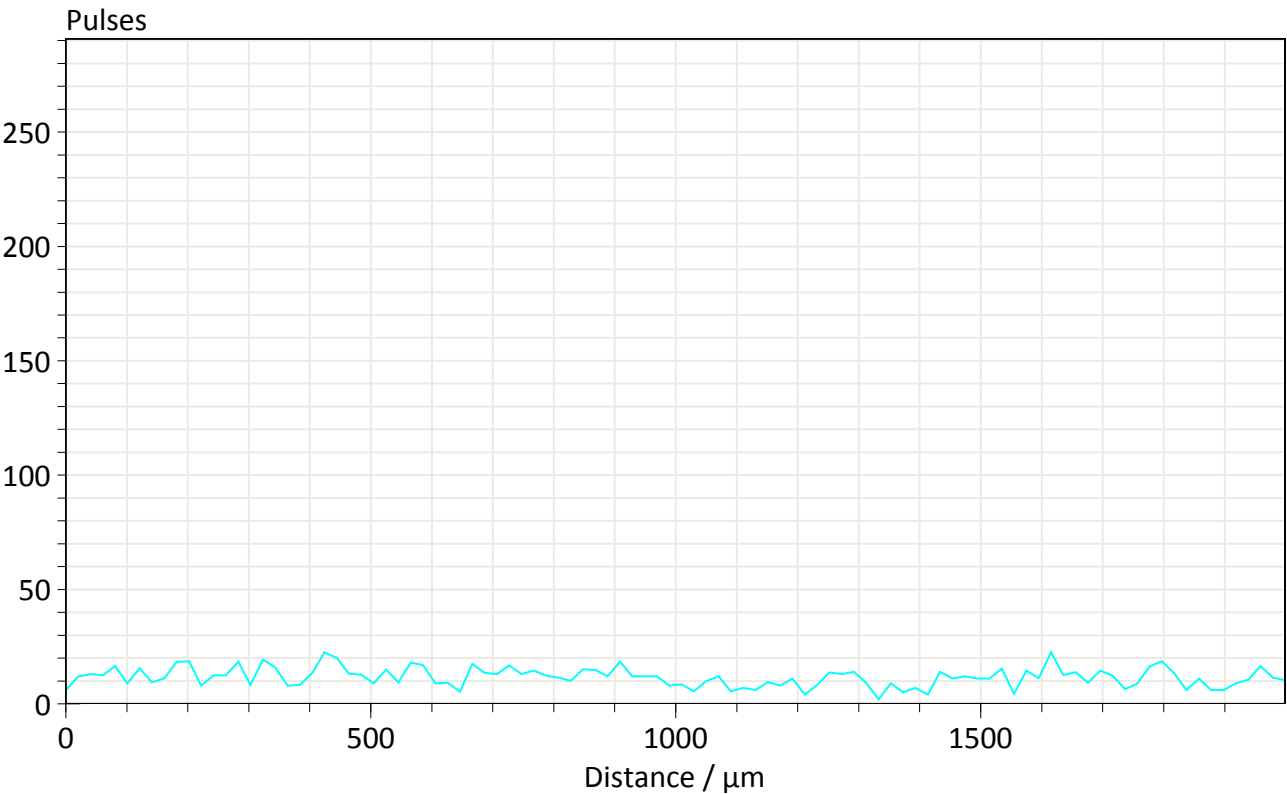

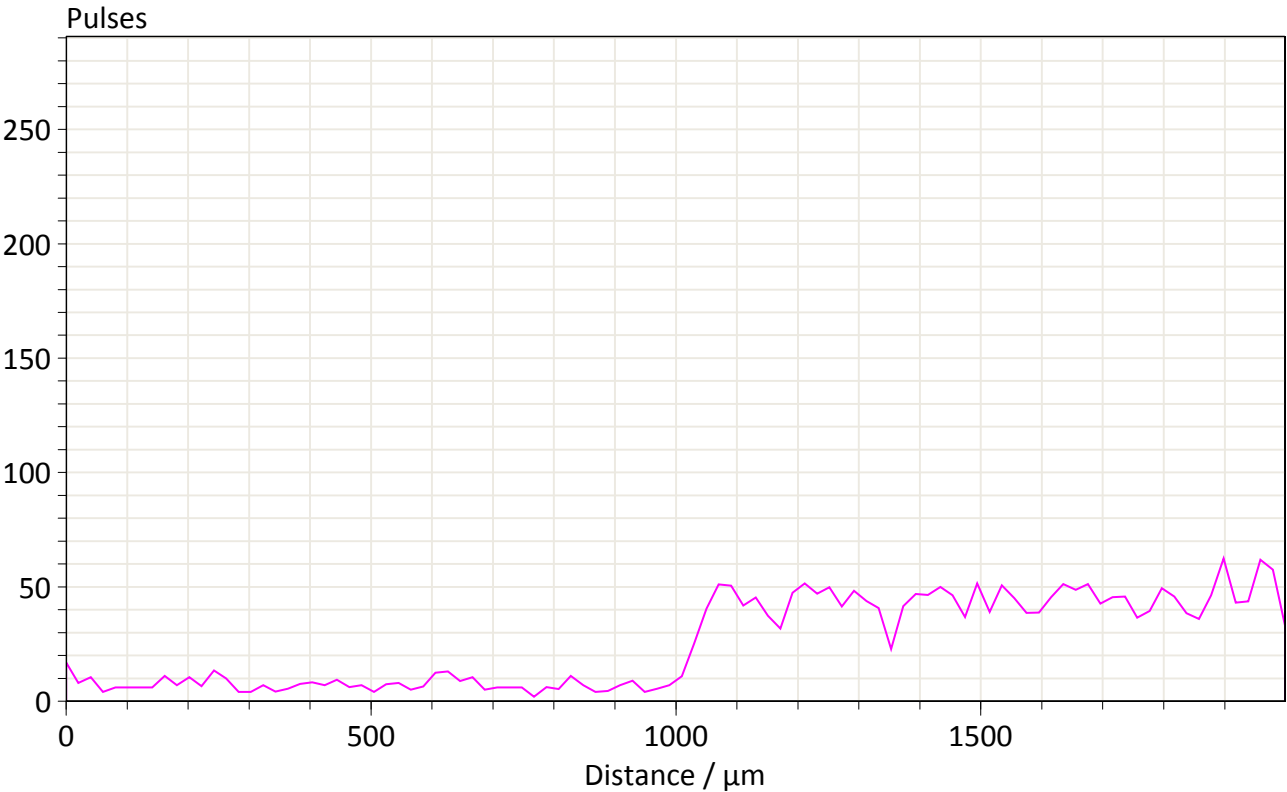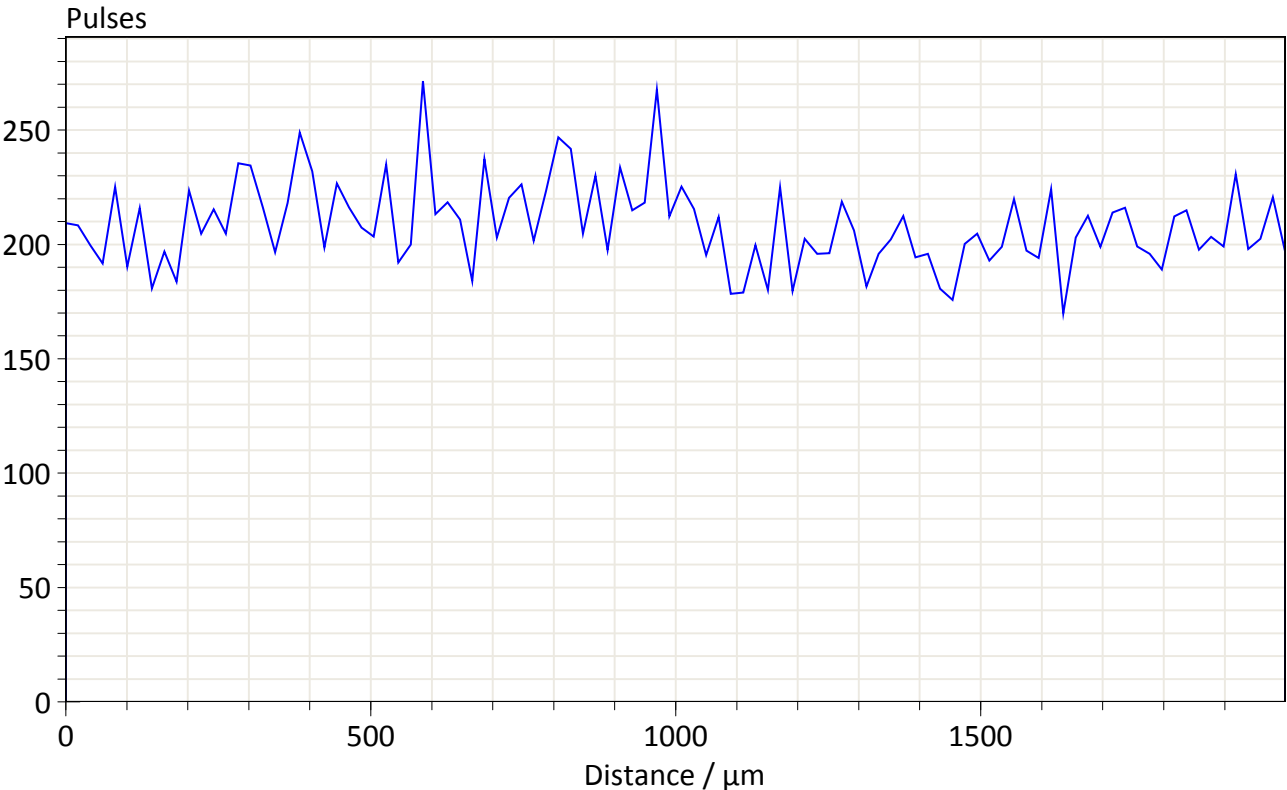



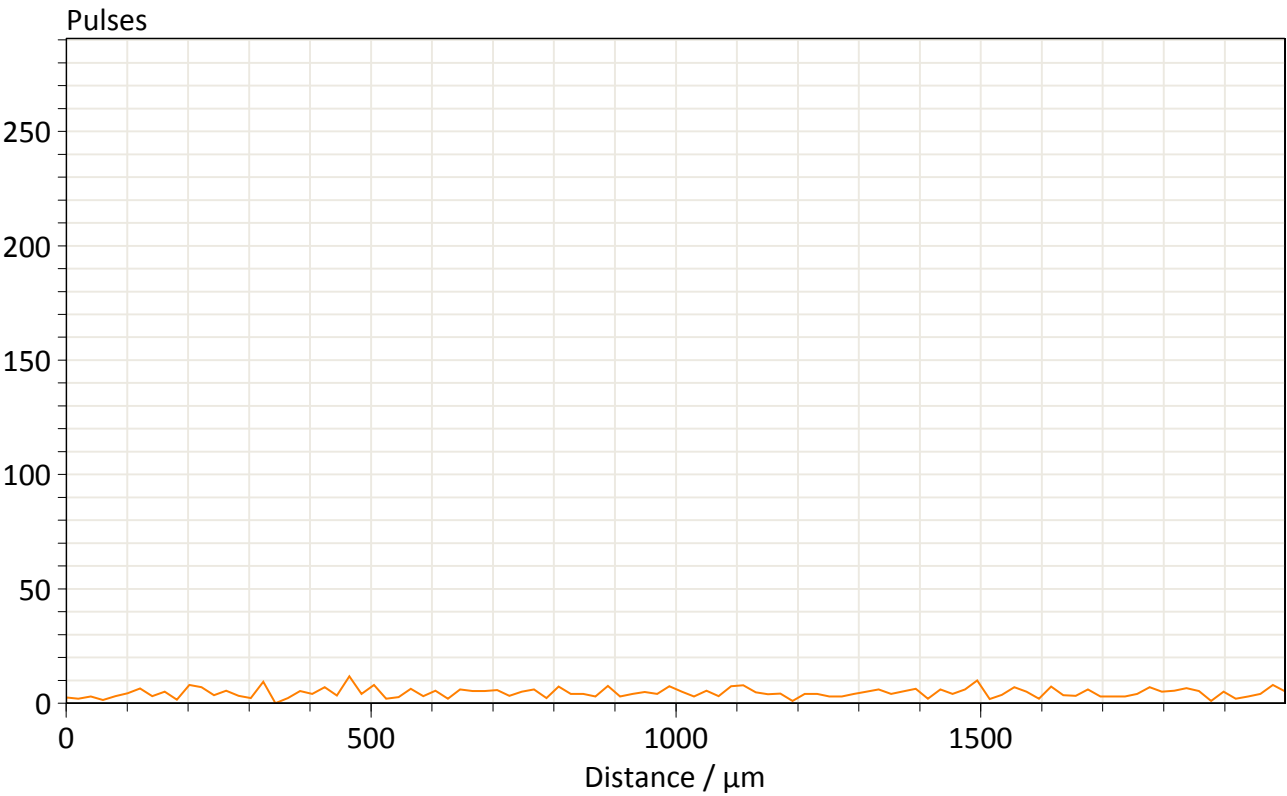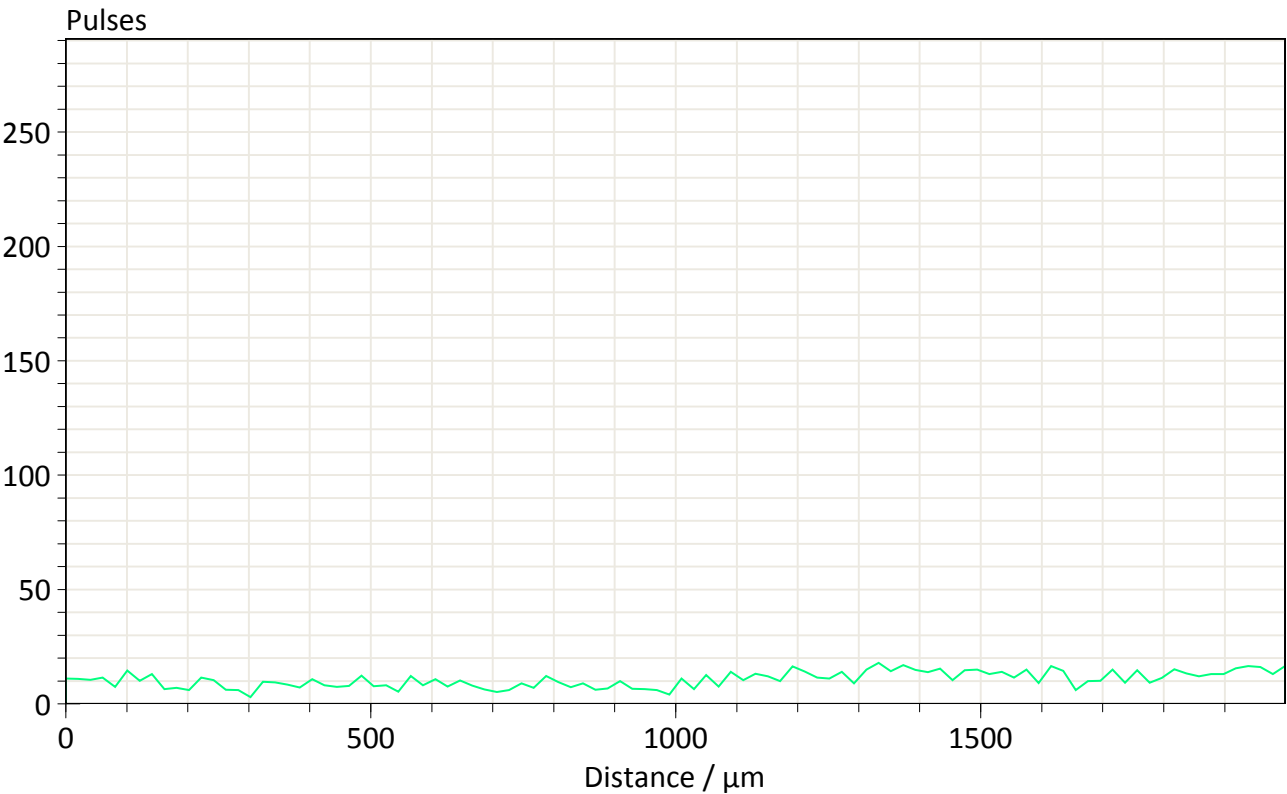

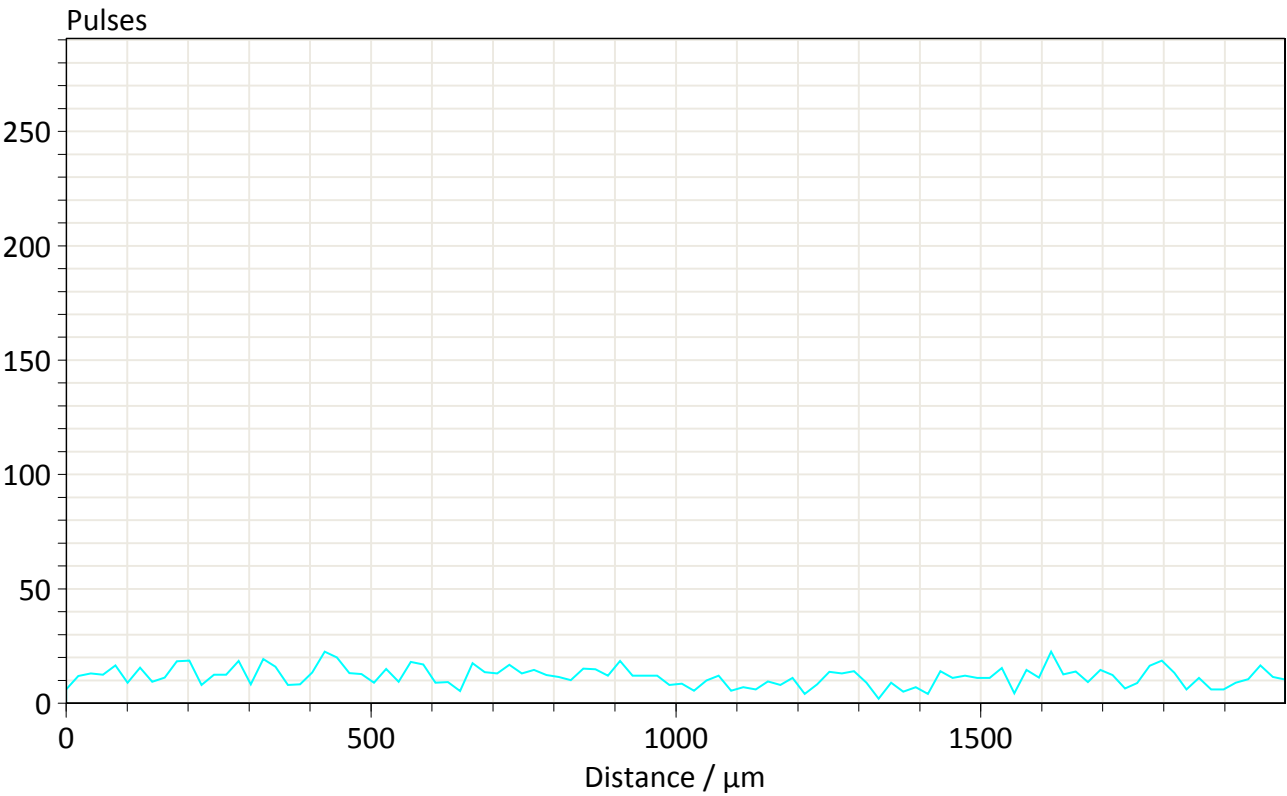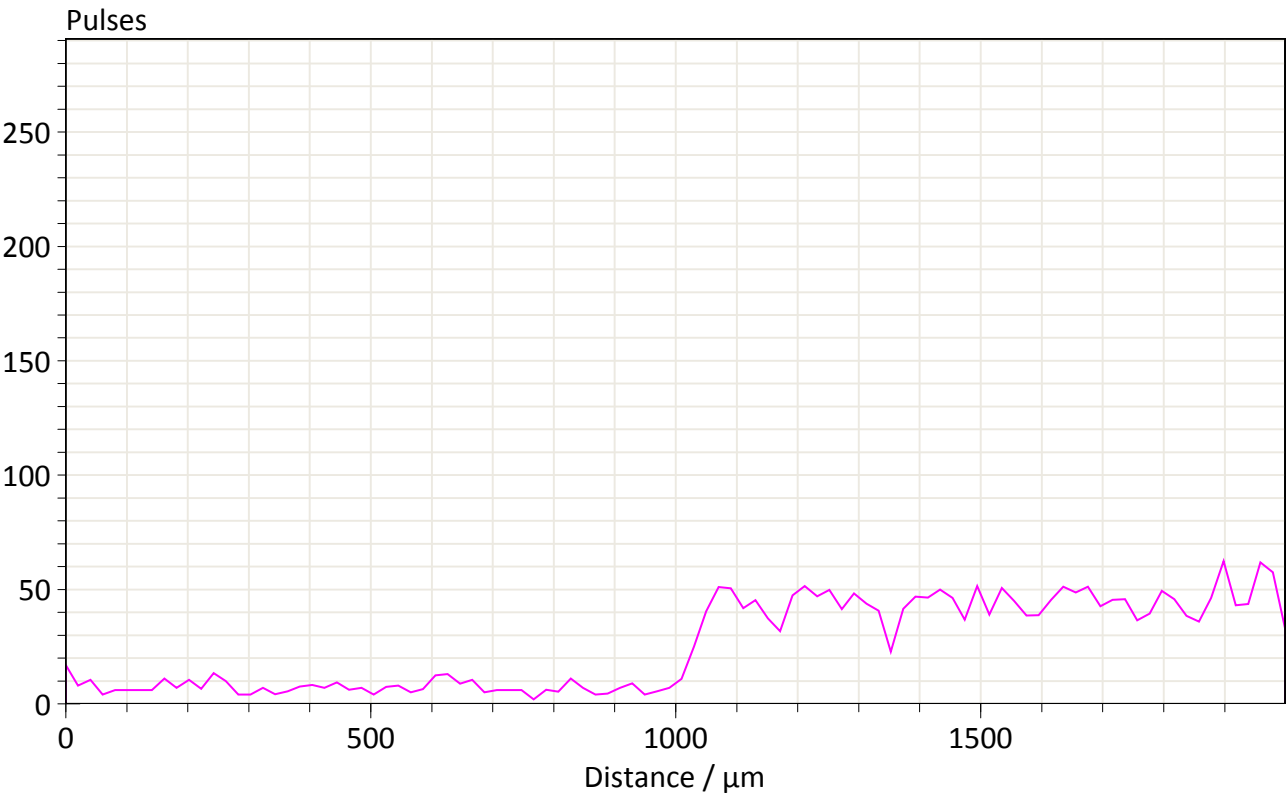



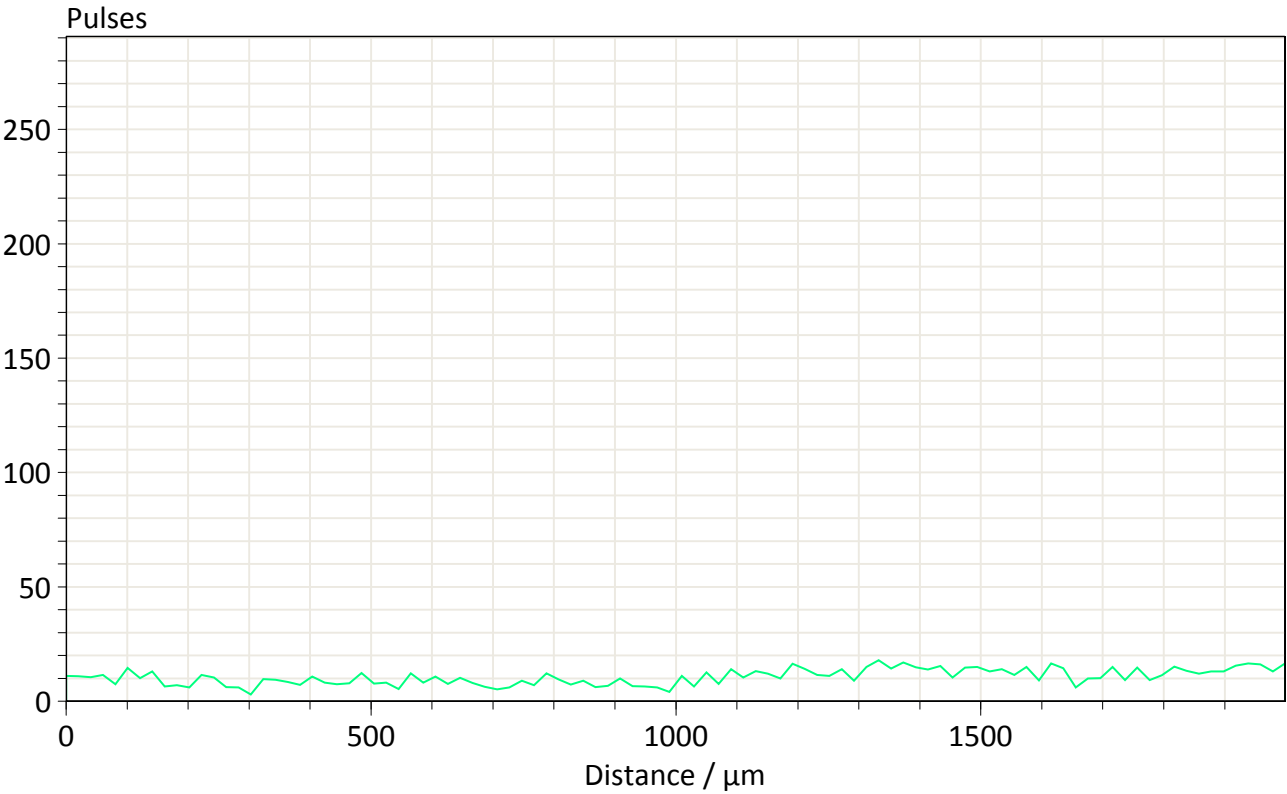

Supplement: s1 [file s1]
