# Supplementary material
Source: MDPI journal article supplement (https://www.mdpi.com/2075-4701/10/7/958)
Supplement: s1 [file s1]

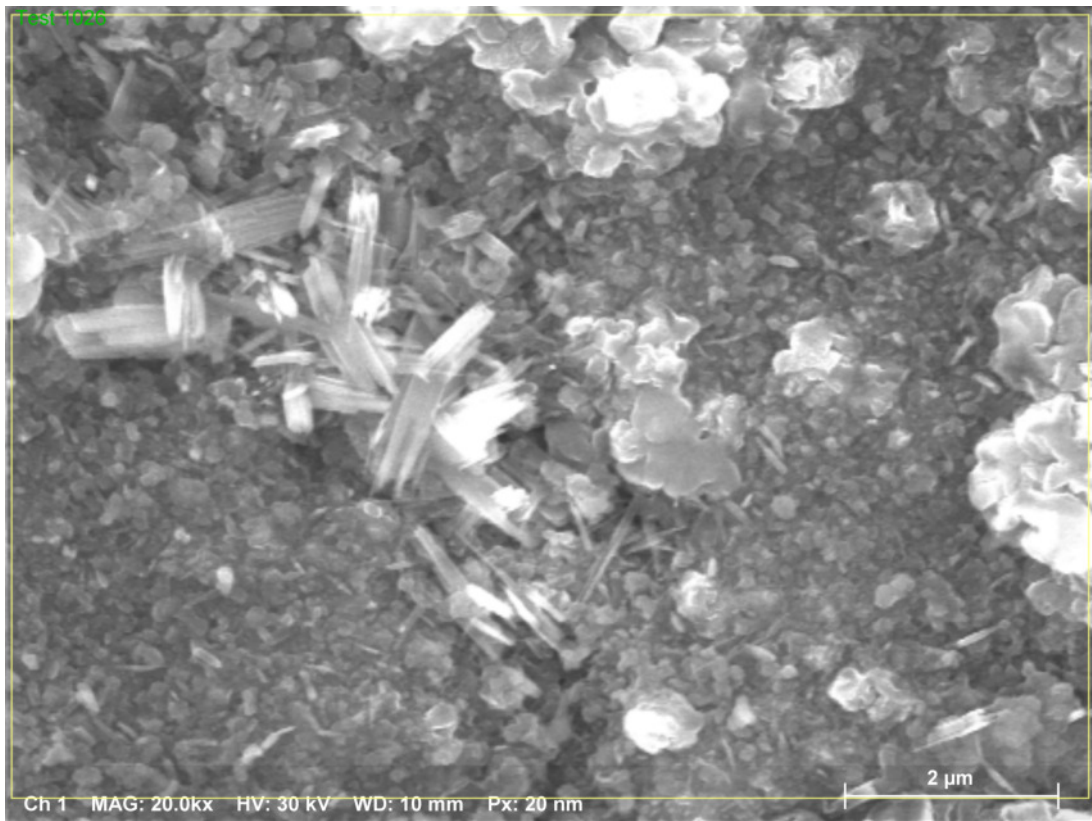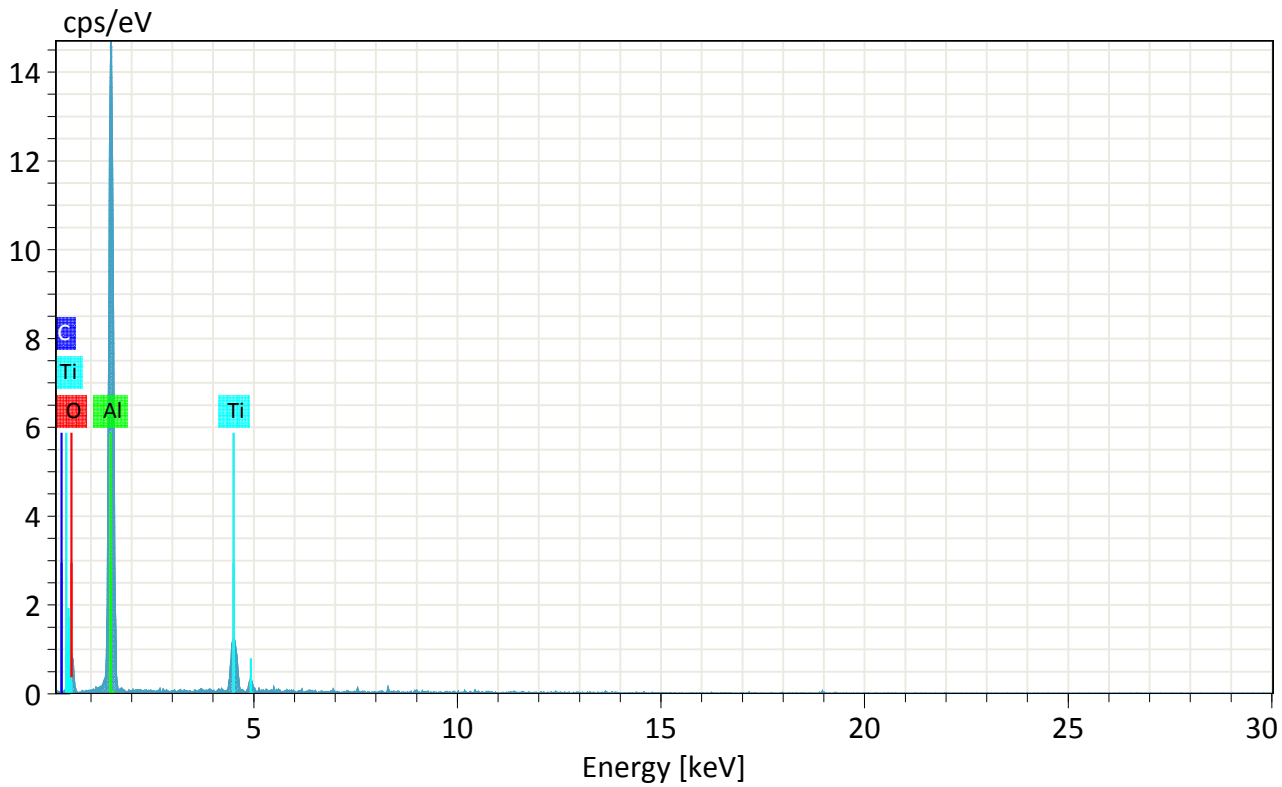

# Application Note

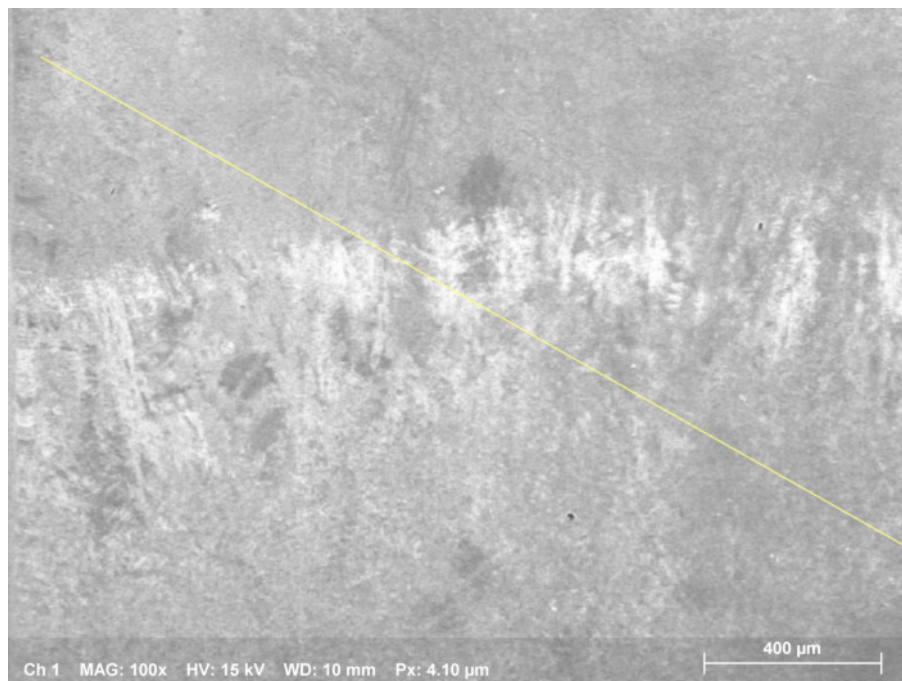

| Name     | Date     | Time        | HV<br>[kV] | Mag  | WD<br>[mm] |
|----------|----------|-------------|------------|------|------------|
| Test 174 | 3/8/2019 | 12:18:56 PM | 15.0 keV   | 100x | 10.0 mm    |

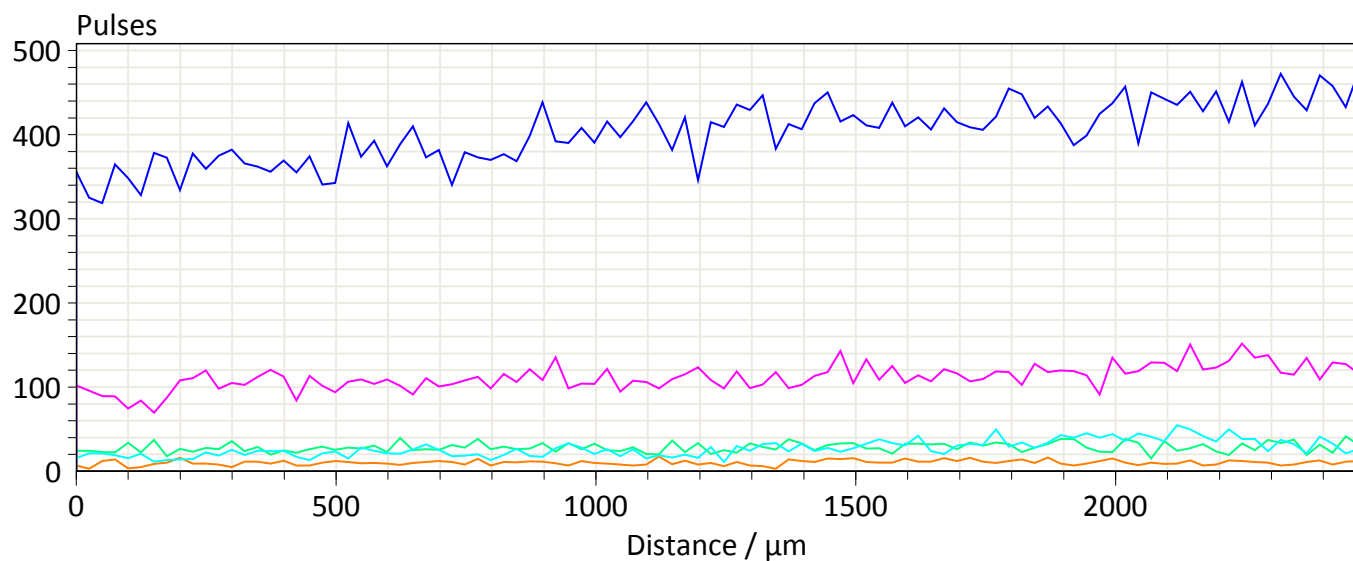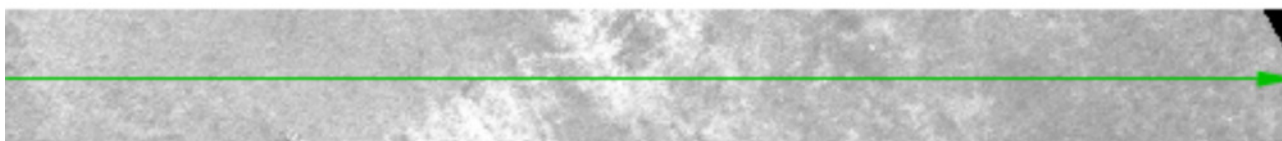

| Name | Date     | Time        | Points | Length<br>[mm]       |
|------|----------|-------------|--------|----------------------|
| Test | 3/8/2019 | 12:22:20 PM | 100    | 2467.4 $\mu\text{m}$ |
