# Supplementary material
Source: MDPI journal article supplement (https://www.mdpi.com/2075-4701/10/7/958)
Supplement: s1 [file s1]

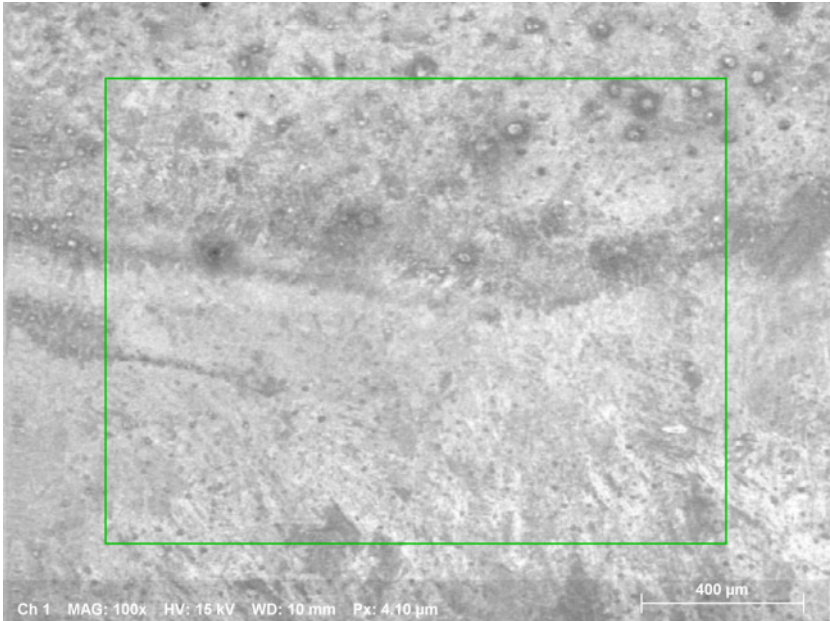

| Name     | Date     | Time        | HV<br>[kV] | Mag  | WD<br>[mm] |
|----------|----------|-------------|------------|------|------------|
| Test 178 | 3/8/2019 | 12:31:33 PM | 15.0 keV   | 100x | 10.0 mm    |

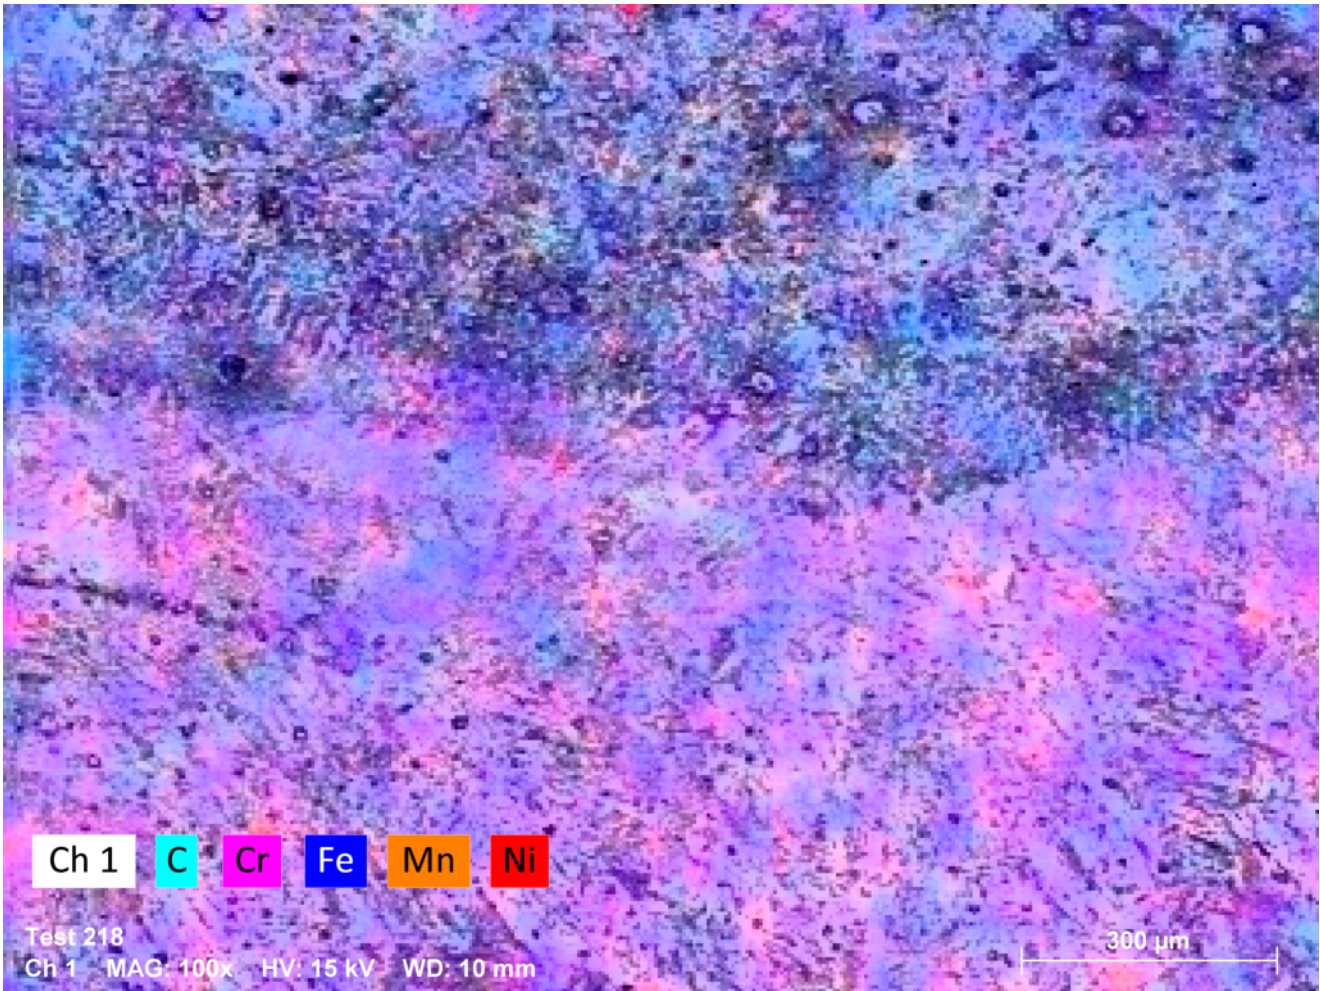

| Name     | Date     | Time        | HV<br>[kV] | Mag  | WD<br>[mm] |
|----------|----------|-------------|------------|------|------------|
| Test 218 | 3/8/2019 | 12:31:47 PM | 15.0 keV   | 100x | 10.0 mm    |

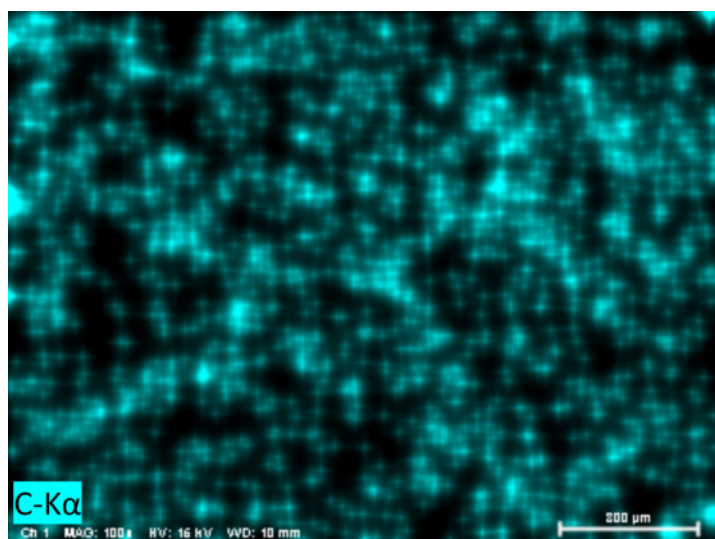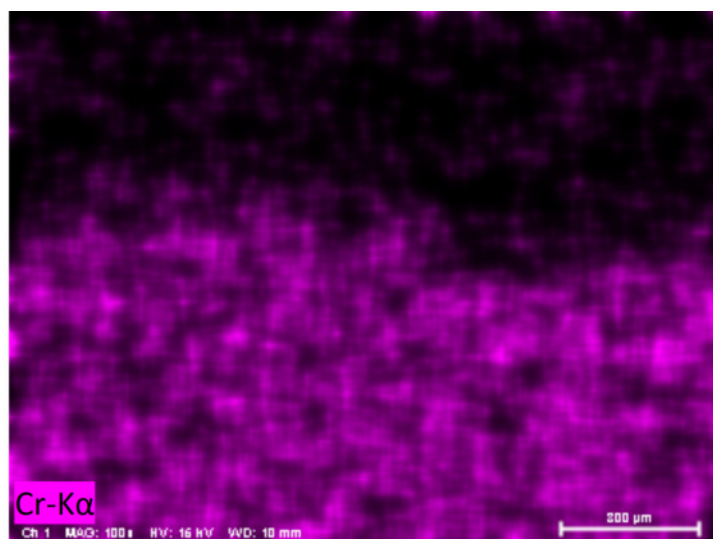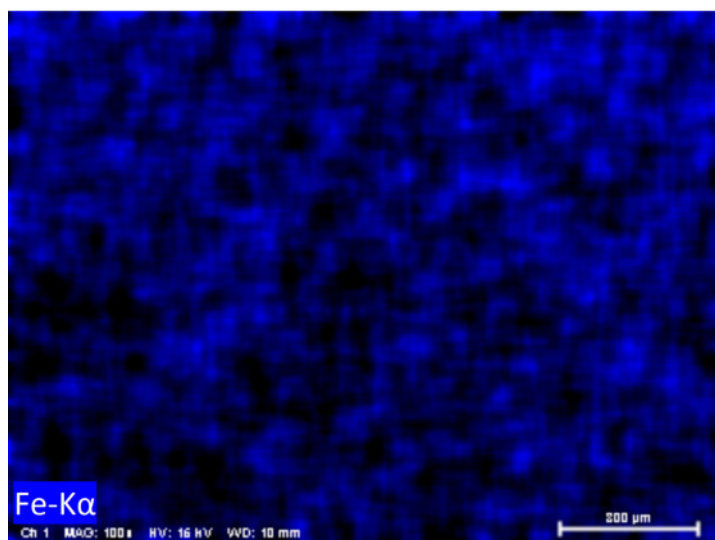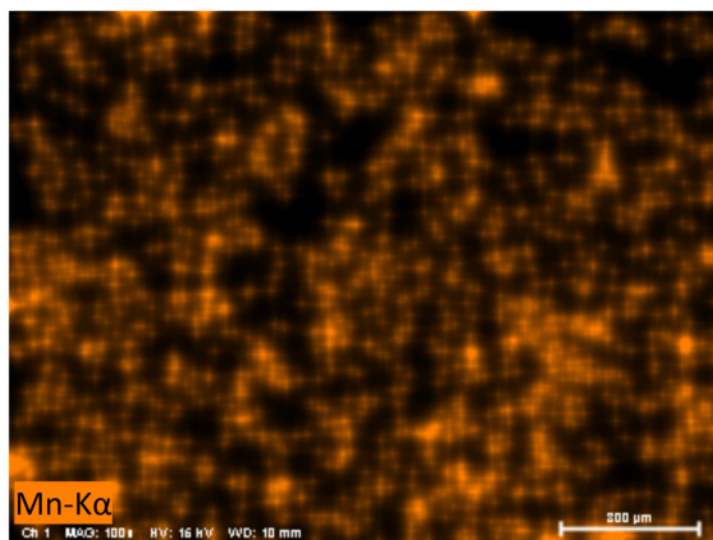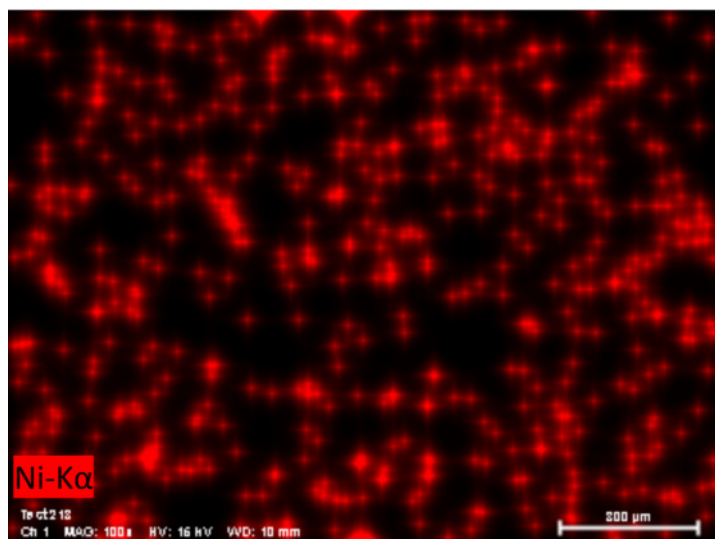

| Date     | Time        | HV<br>[kV] | Mag  | WD<br>[mm] |
|----------|-------------|------------|------|------------|
| 3/8/2019 | 12:33:32 PM | 15.0 keV   | 100x | 10.0 mm    |
