# Supplementary material
Source: MDPI journal article supplement (https://www.mdpi.com/2075-4701/10/7/958)
Supplement: s1 [file s1]

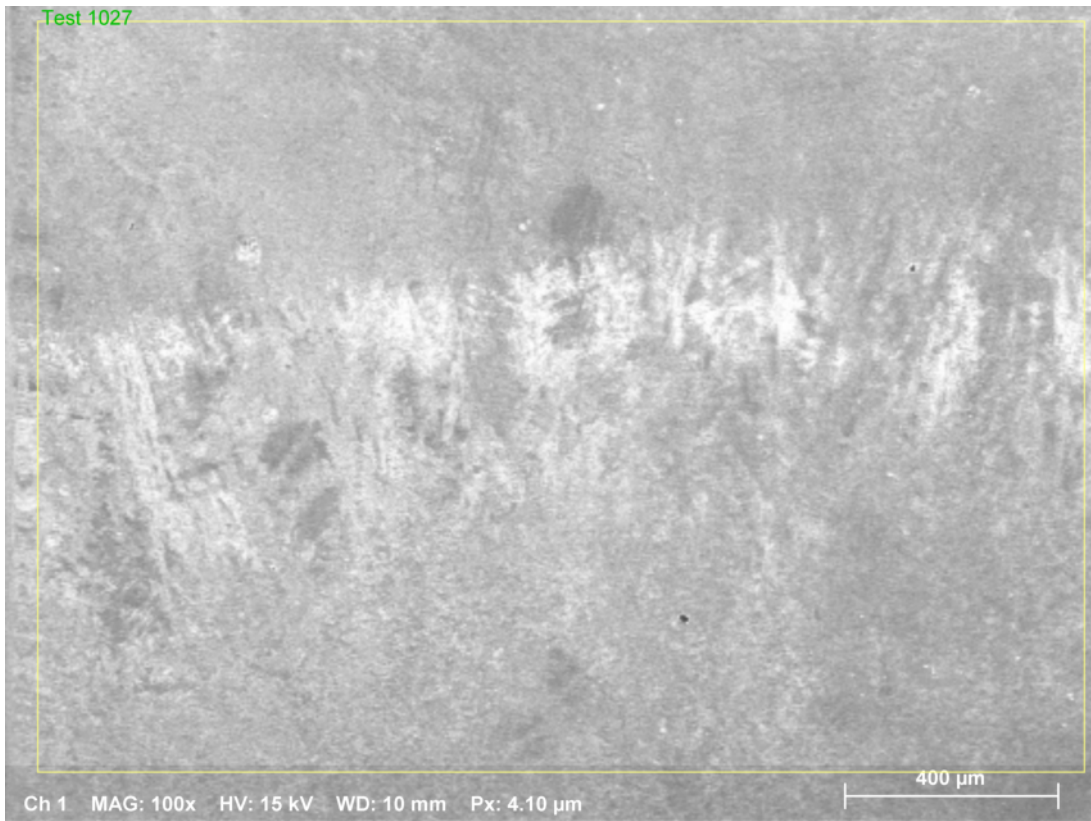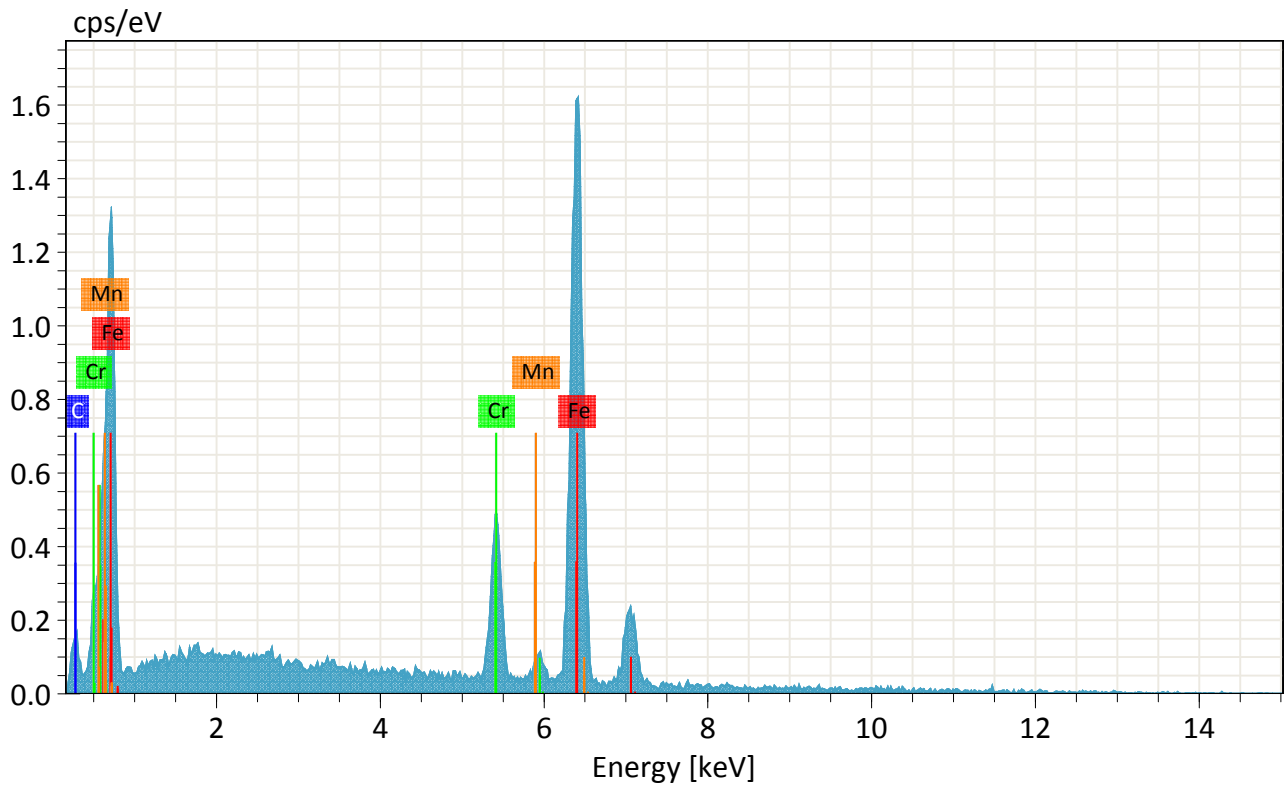

# Application Note

Test 1027

| Element | At. No. | Mass [%]     | Mass Norm. [%] | Atom [%]      | abs. error [%]<br>(1 sigma) | rel. error [%]<br>(1 sigma) |
|---------|---------|--------------|----------------|---------------|-----------------------------|-----------------------------|
| Fe      | 26      | 76.68        | 81.93          | 66.87         | 2.47                        | 3.22                        |
| Cr      | 24      | 11.12        | 11.88          | 10.42         | 0.45                        | 4.04                        |
| C       | 6       | 5.55         | 5.93           | 22.50         | 1.78                        | 32.09                       |
| Mn      | 25      | 0.24         | 0.25           | 0.21          | 0.07                        | 28.66                       |
|         |         | <b>93.59</b> | <b>100.00</b>  | <b>100.00</b> |                             |                             |
